# Supplementary material for: Effects of Heat-Killed Levilactobacillus brevis KB290 in Combination with β-Carotene on Influenza Virus Infection in Healthy Adults: A Randomized Controlled Trial
Source: MDPI journal article supplement (doi:10.3390/nu13093039), 2021-08-30
Supplement: s1 [file s1]

**Table S1–S4.**

**Table S1.** Incidence and degree of typical subjective symptoms during influenza infection <sup>1</sup>.

| Typical symptoms |                | KB290+ $\beta$ C<br>(n = 31) | Placebo<br>(n = 36) | p-value |
|------------------|----------------|------------------------------|---------------------|---------|
| Incidence        | Sore throat    | 26/5                         | 32/4                | 0.72    |
|                  | Headache       | 29/2                         | 33/3                | 1.0     |
|                  | Cough          | 31/0                         | 34/2                | 0.50    |
|                  | Abdominal pain | 11/20                        | 8/28                | 0.23    |
| Degree           | Sore throat    | 1.38 $\pm$ 0.41              | 1.28 $\pm$ 0.33     | 0.43    |
|                  | Headache       | 1.57 $\pm$ 0.49              | 1.47 $\pm$ 0.40     | 0.47    |
|                  | Cough          | 1.42 $\pm$ 0.45              | 1.30 $\pm$ 0.30     | 0.33    |
|                  | Abdominal pain | 1.11 $\pm$ 0.19              | 1.29 $\pm$ 0.70     | 1.0     |

<sup>1</sup> Values in "Incidence" are expressed as yes/no numbers of subjects. Values in "Degree" are expressed as average scores (mean  $\pm$  SD).

**Table S2.** Incidence and degree of typical subjective symptoms during fever <sup>1</sup>.

| Typical symptoms |                | KB290+βC<br>(n = 111) | Placebo<br>(n = 109) | <i>p</i> -value |
|------------------|----------------|-----------------------|----------------------|-----------------|
| Incidence        | Sore throat    | 69/42                 | 74/35                | 0.37            |
|                  | Headache       | 81/30                 | 83/26                | 0.59            |
|                  | Cough          | 75/36                 | 67/42                | 0.34            |
|                  | Abdominal pain | 34/77                 | 31/78                | 0.72            |
| Degree           | Sore throat    | 1.70 ± 0.73           | 1.61 ± 0.68          | 0.53            |
|                  | Headache       | 1.55 ± 0.67           | 1.63 ± 0.63          | 0.29            |
|                  | Cough          | 1.51 ± 0.57           | 1.45 ± 0.54          | 0.49            |
|                  | Abdominal pain | 1.40 ± 0.65           | 1.40 ± 0.66          | 0.87            |

<sup>1</sup> Values in "Incidence" are expressed as yes/no numbers of subjects. Values in "Degree" are expressed as average scores (mean ± SD).

**Table S3.** Duration until body temperature returned to normal and maximum body temperature during influenza infection <sup>1</sup>.

|                                                    | <b>KB290+βC<br/>(n = 31)</b> | <b>Placebo<br/>(n = 36)</b> | <b><i>p</i>-value</b> |
|----------------------------------------------------|------------------------------|-----------------------------|-----------------------|
| Duration until body temperature returned to normal | 2.0 ± 0.9                    | 2.0 ± 1.1                   | 0.94                  |
| Maximum body temperature                           | 38.72 ± 0.64                 | 38.61 ± 0.76                | 0.84                  |

<sup>1</sup> Values in “Duration until body temperature returned to normal” are expressed as average days (mean ± SD). Values in “Maximum body temperature” are expressed as average maximum body temperatures (mean ± SD).

**Supplementary Table S4.** Maximum body temperature during fever <sup>1</sup>.

|                          | <b>KB290+βC</b><br><b>(n = 111)</b> | <b>Placebo</b><br><b>(n = 109)</b> | <b><i>p</i>-value</b> |
|--------------------------|-------------------------------------|------------------------------------|-----------------------|
| Maximum body temperature | 38.22 ± 0.67                        | 38.29 ± 0.66                       | 0.26                  |

<sup>1</sup> Values in “Maximum body temperature” are expressed as average maximum body temperatures (mean ± SD).
